# Supplementary material for: Smartphone-Supported versus Full Behavioural Activation for Depression: A Randomised Controlled Trial
Source: PubMed Central journal article supplement (PMC4444307; doi:10.1371/journal.pone.0126559), 2015-05-26

Supplemental Fig. 1 Screenshots of the smartphone application.

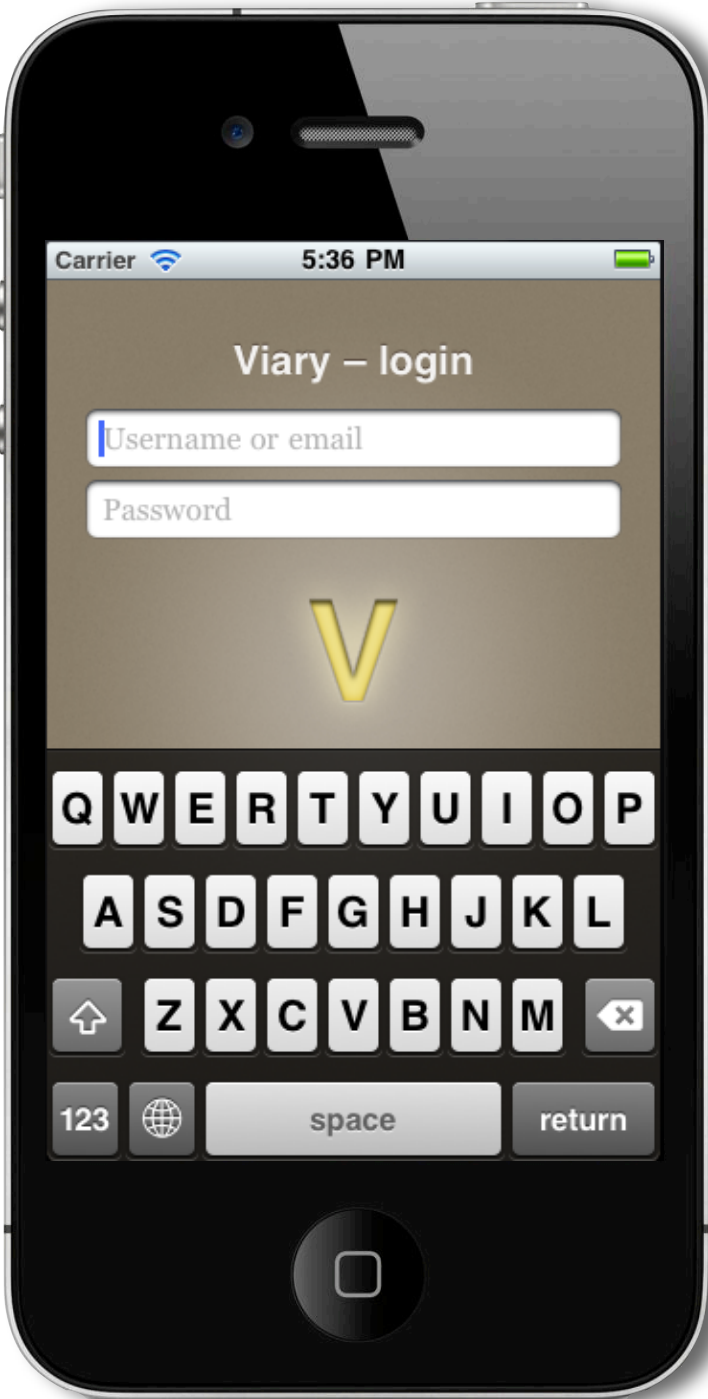

Supplemental Fig. 1 Screenshots of the smartphone application.

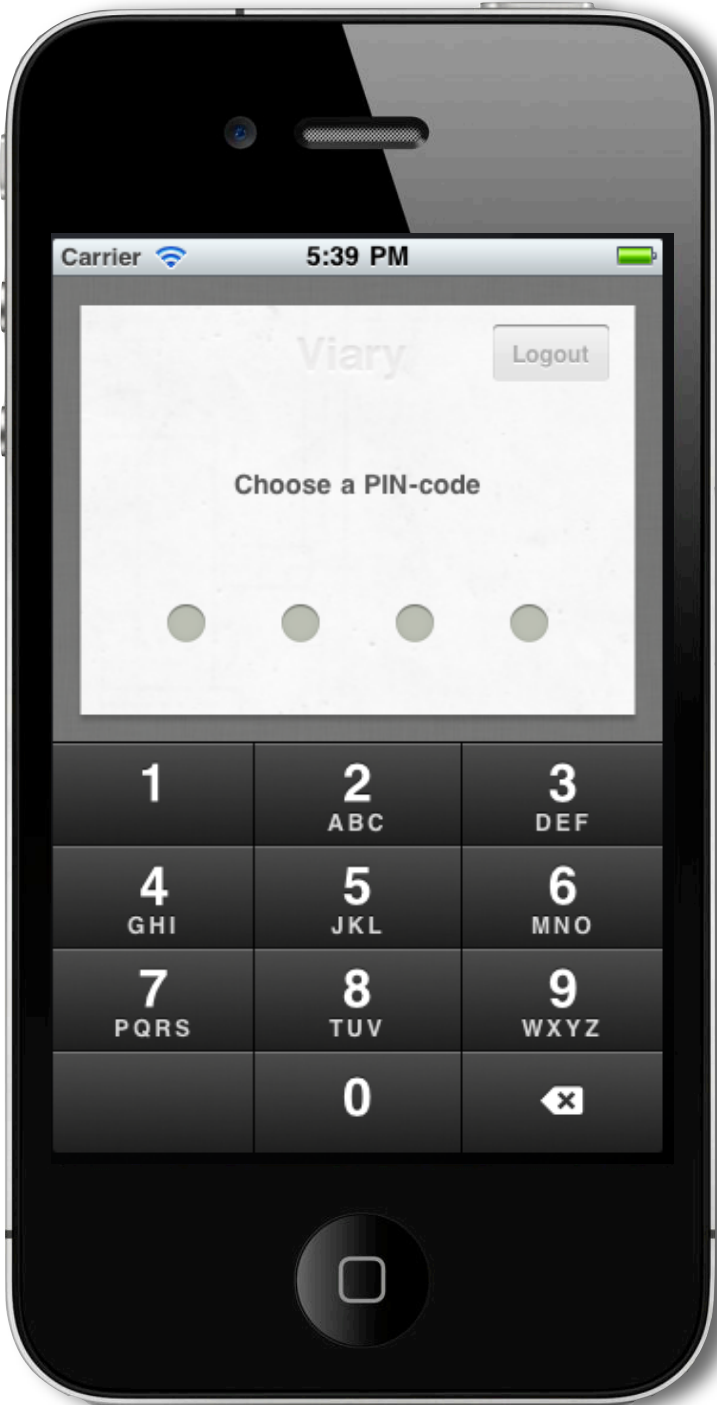

Supplemental Fig. 1 Screenshots of the smartphone application.

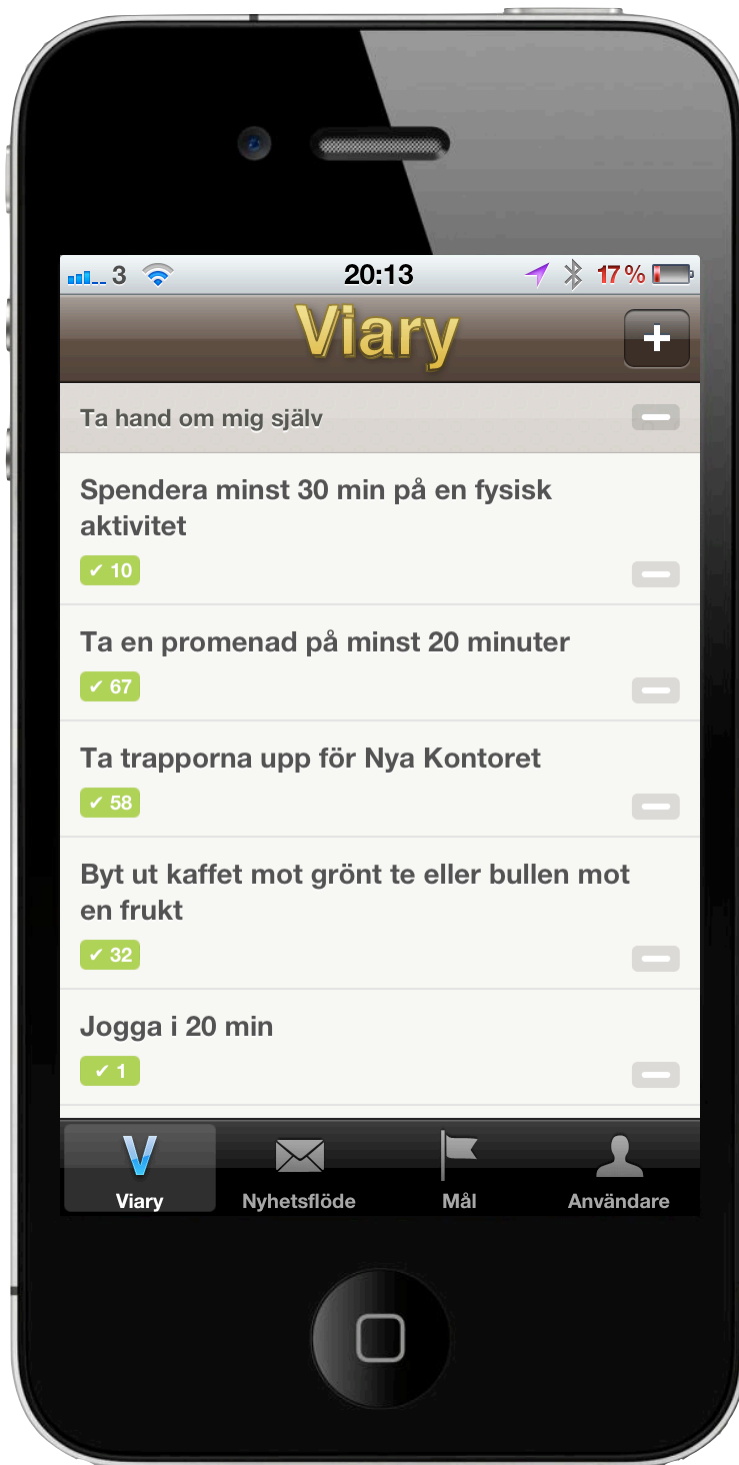

Supplemental Fig. 1 Screenshots of the smartphone application.

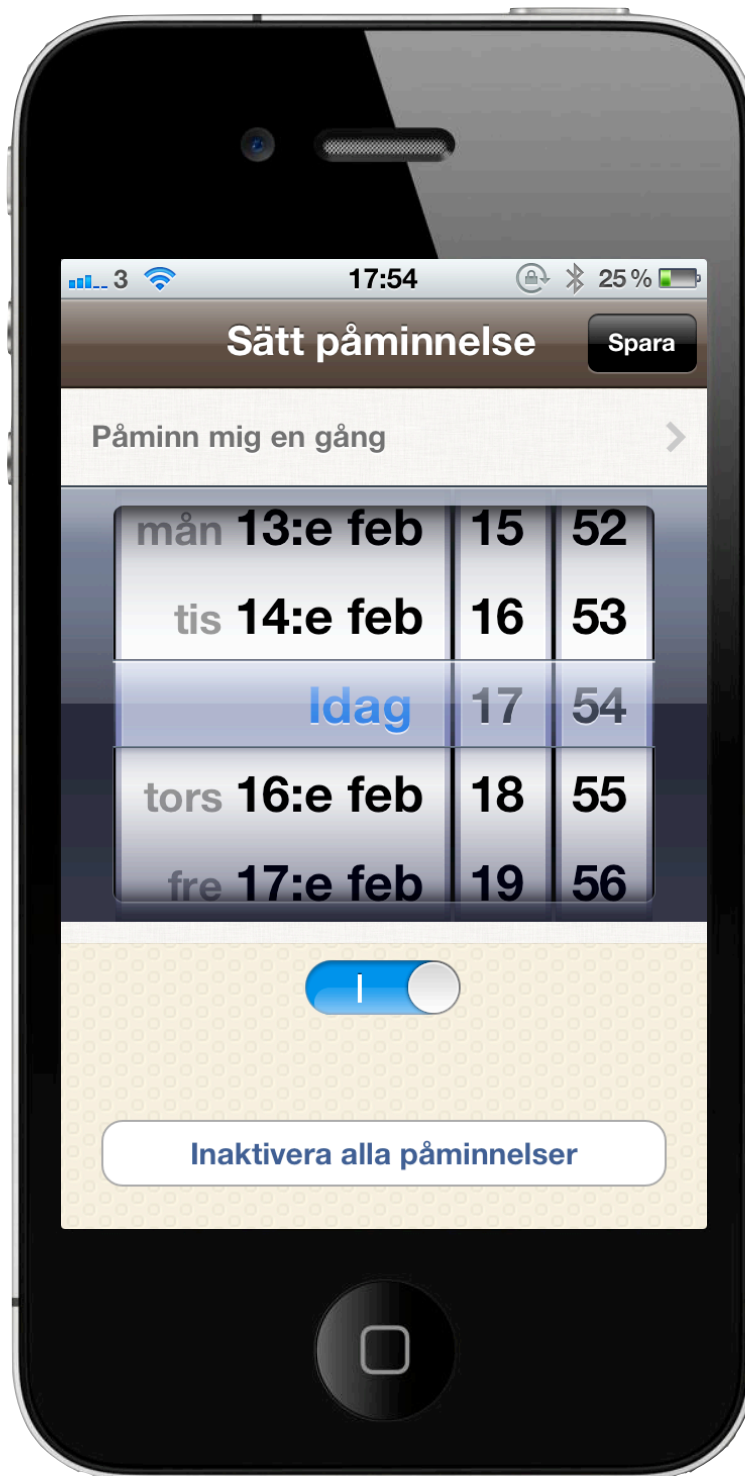

Supplemental Fig. 1 Screenshots of the smartphone application.

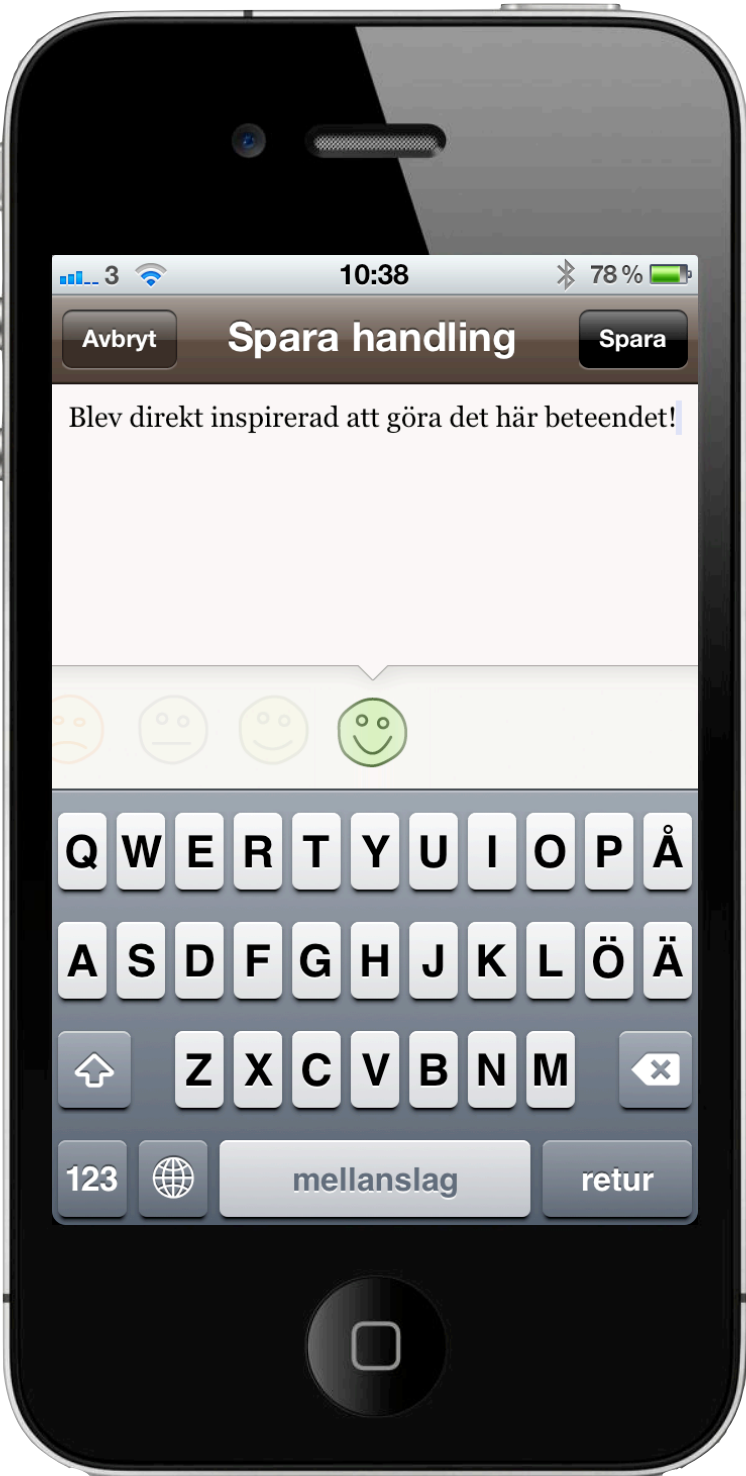

Supplemental Fig. 1 Screenshots of the smartphone application.

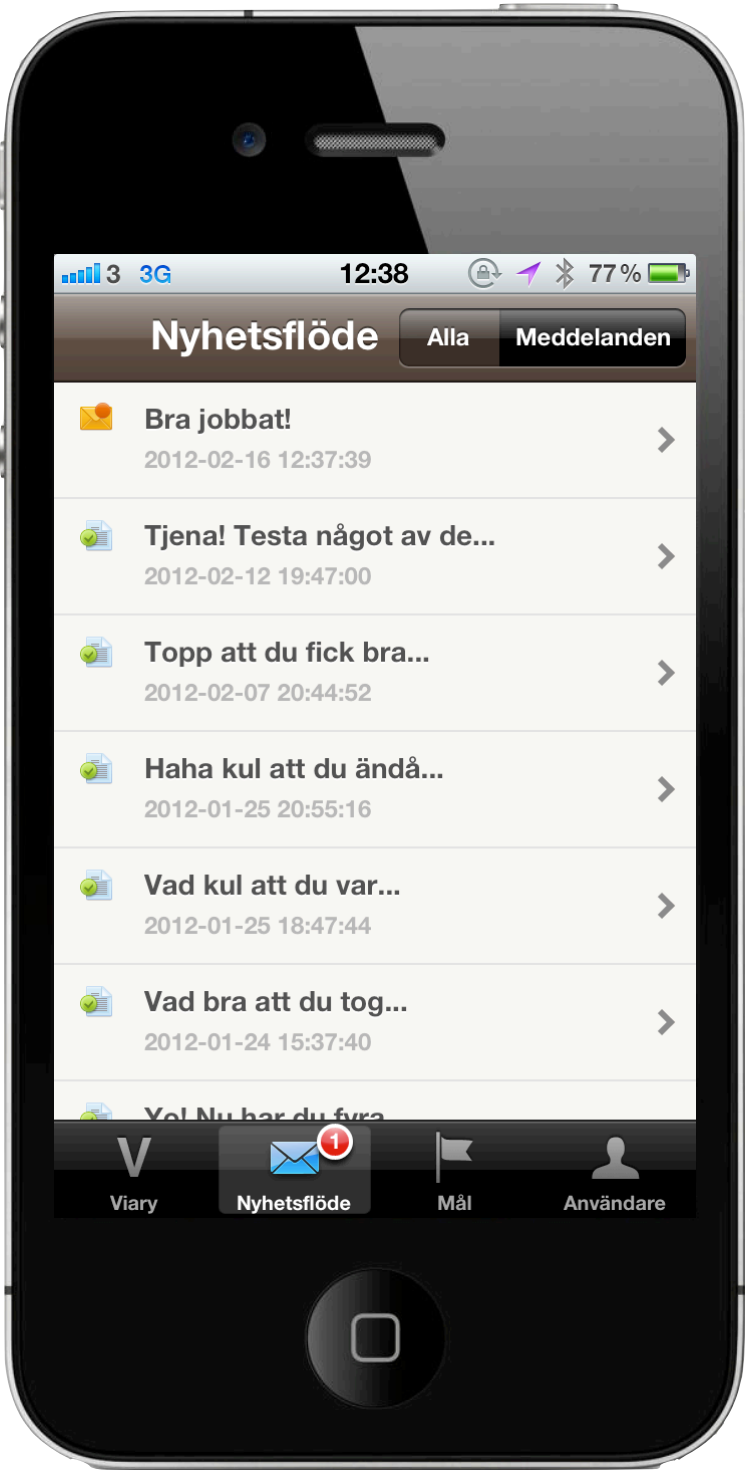

Supplemental Fig. 1 Screenshots of the smartphone application.

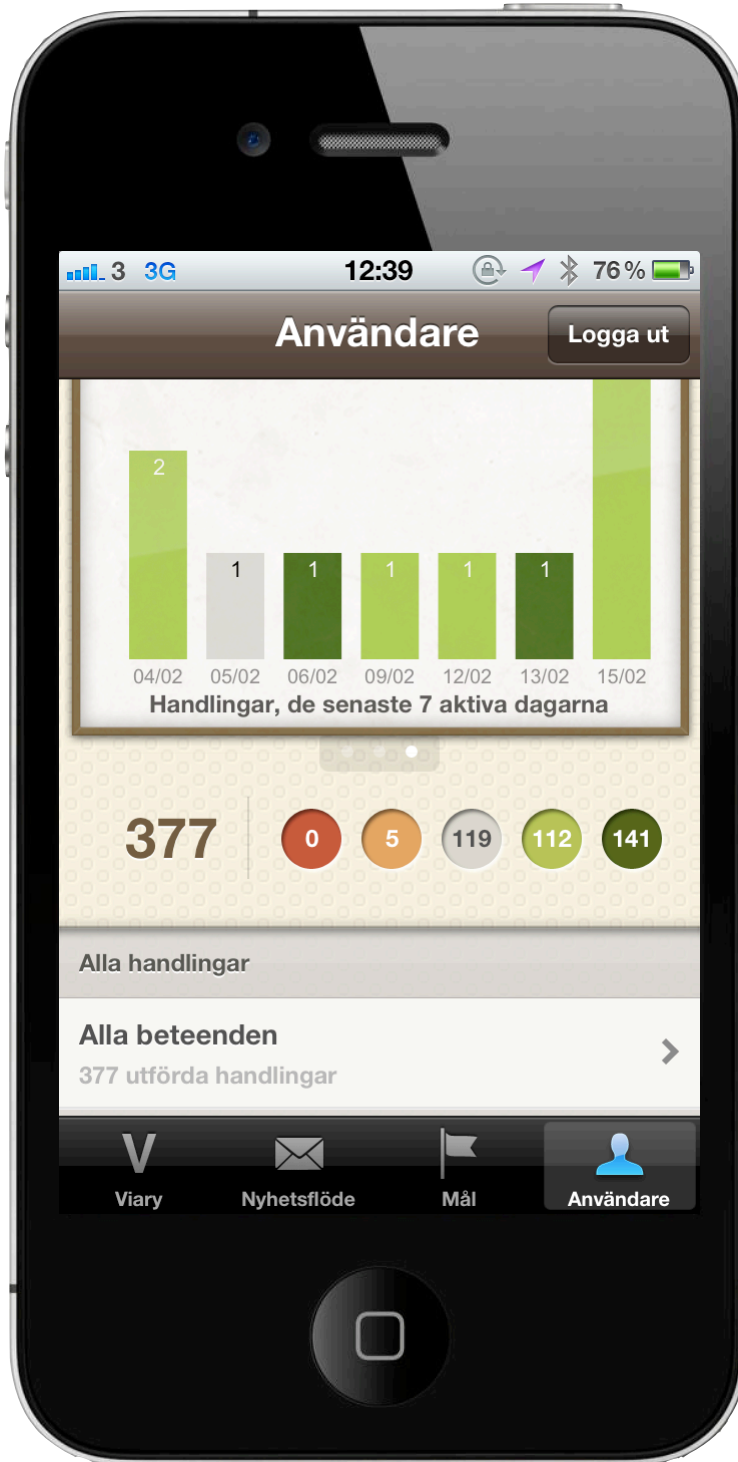

Supplement: pone.0126559.s003.pdf [file pone.0126559.s003.pdf]
