# Supplementary material for: Smartphone-Supported versus Full Behavioural Activation for Depression: A Randomised Controlled Trial
Source: PubMed Central journal article supplement (PMC4444307; doi:10.1371/journal.pone.0126559), 2015-05-26
Supplement: pone.0126559.s004.pdf [file pone.0126559.s004.pdf]

## **Supplemental Fig. 2** Behavioural activities listed in the database.

### **Everyday activity structure**

Get out of bed when the alarm clock rings in the morning  
Taking a shower  
Get ready in the morning  
Eat breakfast  
Read the newspaper  
Write a meal plan for each day of the week  
Write a shopping list for meals  
Buy food for the meals you have planned  
Prepare a simple meal  
Clean a part of my home  
Clean at least 15 minutes  
Washing dishes immediately after a meal  
Wash my cloths  
Plan my TV time with the TV schedule  
Turn off the TV before 9 pm, if I'm still watching TV.  
Turn off the computer before pm, if I'm still on the Internet  
Take a brisk walk for 10 minutes  
Log in to my online banking account and pay a bill  
Entering my weekly activities in my calendar

### **Social behaviour**

Texting a friend and ask what he / she does  
Call a friend and ask what the situation is  
Take a walk with a friend  
Book a meeting with someone in my family  
Suggest a coffee with a friend or family member  
Suggest a lunch with a friend or family member  
Go to the playground with my kids  
Bake something with my children  
Meet a friend in the evening and ask how your day was  
Watching with a friend an episode of a TV series  
Go to the movies with a friend  
Cooking with someone

### **New activities**

Buy or borrow a book I wanted to read  
Read a book out loud at least 20 minutes  
Go to a new cafe and drink coffee  
Look up, where the nearest training center is.  
Read about online- training  
Post a workout plan for the week  
Ask a friend if he / she likes to come along and workout  
Have at least 30 minutes of physical activity  
Listen to a radio program  
Watch a documentary on TV  
Eat out and have a good meal  
Write down at least two good things that happened to me  
Rent a movie and have a night in  
Look up the exhibits that are in my city  
Go to an exhibition at a museum  
Look up the concerts that are current right now  
Go to a concert  
Look up current things happening in my city  
Attend a church service  
Solve a crossword  
Make a Sudoku  
Listen to music without doing anything else and focus on what I hear  
Go to town and buy something nice for myself
